# Supplementary material for: Educational Inequality in Obesity-Related Mortality in Korea
Source: PubMed Central journal article supplement — J Korean Med Sci. 2017 Jan 23;32(3):386–92. doi: 10.3346/jkms.2017.32.3.386 (PMC5290095; doi:10.3346/jkms.2017.32.3.386), 2017-01-23
Supplement: jkms-32-386-s001.pdf [file jkms-32-386-s001.pdf]

**Supplementary Table 1.** Time trend of RII\* (95% CIs) for mortality from each obesity related cancer by education level in Koreans 25–74 years of age

| Sex   | Year                         | Esophageal cancer | Gallbladder cancer | Colon cancer     | Pancreas cancer  | Breast cancer    | Endometrial cancer |
|-------|------------------------------|-------------------|--------------------|------------------|------------------|------------------|--------------------|
| Men   | 2001                         | 4.39 (3.44–5.61)  | 2.26 (1.48–3.44)   | 1.21 (1.02–1.43) | 2.01 (1.63–2.46) | -                | -                  |
|       | 2006                         | 4.99 (3.32–7.49)  | 3.64 (2.00–6.61)   | 1.23 (1.00–1.50) | 2.36 (1.76–3.15) | -                | -                  |
|       | 2011                         | 4.47 (3.49–5.74)  | 2.39 (1.67–3.43)   | 1.66 (1.44–1.90) | 1.41 (1.19–1.68) | -                | -                  |
|       | $P_{\text{trend}}^{\dagger}$ | 0.980             | 0.732              | < 0.001          | 0.028            | -                | -                  |
| Women | 2001                         | 5.22 (1.31–20.82) | 1.45 (0.91–2.32)   | 0.90 (0.70–1.16) | 1.07 (0.77–1.49) | 1.00 (0.76–1.31) | 0.62 (0.40–0.97)   |
|       | 2006                         | 3.24 (0.88–11.99) | 2.55 (1.66–3.92)   | 1.68 (1.35–2.08) | 1.65 (1.23–2.20) | 0.74 (0.62–0.89) | 0.60 (0.44–0.82)   |
|       | 2011                         | 2.57 (0.88–7.46)  | 2.50 (1.68–3.70)   | 1.51 (1.24–1.84) | 1.43 (1.12–1.83) | 0.66 (0.58–0.76) | 0.70 (0.51–0.95)   |
|       | $P_{\text{trend}}^{\dagger}$ | 0.501             | 0.140              | 0.006            | 0.272            | < 0.001          | 0.925              |

RII = relative index of inequality, CIs = confidence intervals.

\*Rate ratio of the mortality rates of those at the lowest education level compared with those at the highest education level. A RII higher than 1 indicates that the mortality rate is higher in the group with lower education level. <sup>†</sup>Assessed by the Poisson regression test.
